# From shallow to deep: exploiting feature-based classifiers for domain adaptation in semantic segmentation

Alex Matskevych<sup>1</sup>, Adrian Wolny<sup>1</sup>, Constantin Pape<sup>1,\*</sup> and Anna Kreshuk<sup>1,\*</sup>

<sup>1</sup>*European Molecular Biology Laboratory, Cell Biology and Biophysics Unit, Heidelberg, Germany*

Correspondence\*:  
Corresponding Authors  
constantin.pape@embl.de, anna.kreshuk@embl.de

## 2 ABSTRACT

3 The remarkable performance of Convolutional Neural Networks on image segmentation tasks  
4 comes at the cost of a large amount of pixelwise annotated images that have to be segmented  
5 for training. In contrast, feature-based learning methods, such as the Random Forest, require  
6 little training data, but never reach the segmentation accuracy of CNNs. This work bridges the  
7 two approaches in a transfer learning setting. We show that a CNN can be trained to correct the  
8 errors of the Random Forest in the source domain and then be applied to correct such errors in  
9 the target domain without retraining, as the domain shift between the Random Forest predictions  
10 is much smaller than between the raw data. By leveraging a few brushstrokes as annotations in  
11 the target domain, the method can deliver segmentations that are sufficiently accurate to act as  
12 pseudo-labels for target-domain CNN training. We demonstrate the performance of the method on  
13 several datasets with the challenging tasks of mitochondria, membrane and nuclear segmentation.  
14 It yields excellent performance compared to microscopy domain adaptation baselines, especially  
15 when a significant domain shift is involved.

16 **Keywords:** Microscopy segmentation, Domain Adaptation, Deep Learning, Transfer Learning, Biomedical segmentation

## 1 INTRODUCTION

17 Semantic segmentation – partitioning the image into areas of biological (semantic) meaning – is a ubiquitous  
18 problem in microscopy image analysis. Compared to natural images, microscopy segmentation problems  
19 are particularly well suited for feature-based (“shallow”) machine learning, as the difference between  
20 semantic classes can often be captured in local edge, texture or intensity descriptors (Berg et al. (2019);  
21 Arganda-Carreras et al. (2017); Belevich et al. (2016)). While convolutional neural networks (CNNs)  
22 have long overtaken feature-based approaches in segmentation accuracy and inference speed, interactive  
23 feature-based solutions continue to attract users due to the low requirements to training data volumes,  
24 nearly real-time training speeds and general simplicity of the setup, which does not require computational  
25 expertise.

26 CNNs are made up of millions of learnable parameters which have to be configured based on user-provided  
27 training examples. With insufficient training data, CNNs are very prone to overfitting, “memorizing”  
28 the training data instead of deriving generalizable rules. Strategies to suppress overfitting include data

29 augmentation (Ronneberger et al. (2015)), incorporation of prior information (El Jurdi et al. (2021)),  
30 dropout and sub-network re-initialization (Taha et al. (2021); Han et al. (2016)) and, in case a similar task  
31 has already been solved on sufficiently similar data, domain adaptation and transfer learning. In the latter  
32 case, the network exploits a large amount of labels in the so called “source” domain to learn good parameter  
33 values for the task at hand, which are further adapted for the unlabeled or sparsely labeled “target” domain  
34 through unsupervised or weakly supervised learning. For microscopy images, the adaptation is commonly  
35 achieved by bringing the distributions of the source and target domain data closer to each other, either by  
36 forcing the network to learn domain-invariant features (Roels et al. (2019); Liu et al. (2020); Long et al.  
37 (2015)) or by using generative networks and cycle consistency constraints (Januszewski and Jain (2019);  
38 Zhang et al. (2018); Chen et al. (2019)). Alternatively, the domain shift can be explicitly learned in a part  
39 of the network (Rozantsev et al. (2018)). In addition to labels in the source domain, pseudo-labels in the  
40 target domain are often used for training (Choi et al. (2019); Xing et al. (2019)). Pseudo-labels can be  
41 computed from the predictions of the source domain network (Choi et al. (2019)) or predictions for pixels  
42 similar to source domain labels (Bermúdez-Chacón et al. (2019)).

43 In contrast, Random Forest (RF), one of the most popular “shallow” learning classifiers (Fernández-  
44 Delgado et al. (2014)), does not overfit on small amounts of training data and trains so fast that in practice  
45 no domain adaptation strategies are applied – the classifier is instead fully retrained with sparse labels  
46 in the target domain. However, unlike a CNN, it cannot fully profit from large amounts of training data.  
47 The aim of our contribution is to combine the best of both worlds, exploiting fast training of the Random  
48 Forest for domain adaptation and excellent performance of CNNs for accurate segmentation with large  
49 amounts of training data. We use the densely labeled source domain to train many Random Forests for  
50 segmentation and then train a CNN for Random Forest prediction enhancement (see Figure 1). On the  
51 target domain, we train a new Random Forest from a few brushstroke labels and simply apply the pre-  
52 trained Prediction Enhancer (PE) network to improve the probability maps. The enhanced predictions are  
53 substantially more accurate than the Random Forest or a segmentation CNN trained only on the source  
54 domain. Furthermore, a new CNN can be trained using enhanced predictions as pseudo-labels, achieving  
55 an even better accuracy with no additional annotation cost. Since the Prediction Enhancer is only trained on  
56 RF probability maps, it remains agnostic to the appearance of the raw data and can therefore be applied to  
57 mitigate even very large domain gaps between source and target datasets, as long as the segmentation task  
58 itself remains similar. To illustrate the power of our approach, we demonstrate domain adaptation between  
59 different datasets of the same modality, and also from confocal to light sheet microscopy, from electron  
60 to confocal microscopy and from fluorescent light microscopy to histology. From the user perspective,  
61 domain adaptation is realized in a straightforward, user-friendly setting of training a regular U-Net, without  
62 adversarial elements or task re-weighting. Furthermore, a well-trained Prediction Enhancer network can  
63 be used without retraining, only requiring training of the Random Forest from the user. Our Prediction  
64 Enhancer networks for mitochondria, nuclei or membrane segmentation tasks are available at the BioImage  
65 Model Zoo (<https://bioimage.io>) and can easily be applied to improve predictions of the Pixel  
66 Classification workflow in ilastik or of the Weka Trainable Segmentation plugin in Fiji.

## 2 METHODS

67 Our approach combines the advantages of feature-based and end-to-end segmentation methods by training  
68 a Prediction Enhancer network to predict one from the other. On the target dataset, retraining can be limited  
69 to the feature-based classifier as its predictions – unlike the raw data – do not exhibit a significant domain

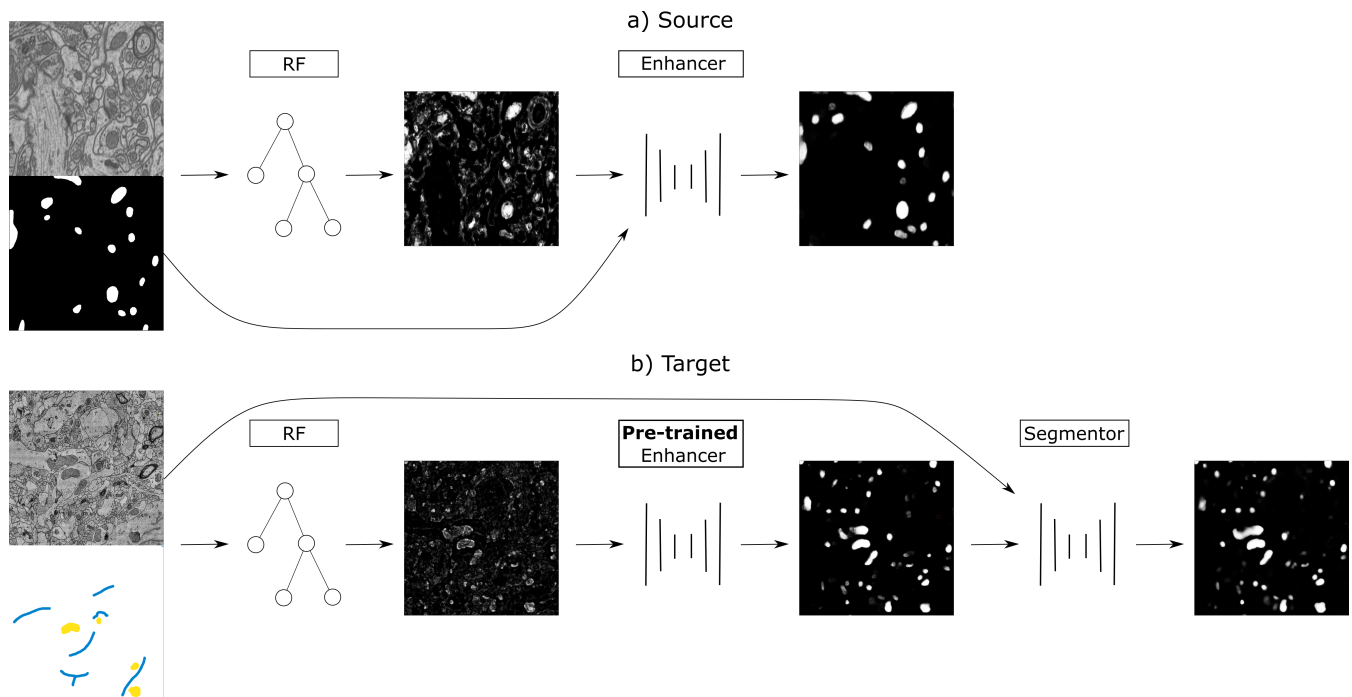

**Figure 1.** a) Training on the source dataset: many Random Forests are trained by subsampling patches of raw data and dense groundtruth segmentation. Random Forest predictions are used as inputs and groundtruth segmentation as labels to train the Prediction Enhancer CNN to improve RF segmentations. b) Domain adaptation to the target dataset: a RF is trained interactively with brushstroke labels. The pre-trained PE is applied to improve the RF predictions. Optionally, PE predictions are used as pseudo-labels to train a segmentation network for even better results with no additional annotations, but using a larger computational budget.

70 shift if the same semantic classes are being segmented. In more detail, we propose the following sequence  
71 of steps (see also Figure 1):

- 72 1. Create training data for the Prediction Enhancer CNN by training multiple Random Forests on random  
73 samples of the densely labeled source domain.
- 74 2. Train the Prediction Enhancer using the RF predictions as input and the ground-truth segmentation as  
75 labels.
- 76 3. Train a Random Forest on the target dataset with a few brushstroke labels and use the pre-trained  
77 Prediction Enhancer to improve the predictions.
- 78 4. Use the improved predictions as pseudo-labels to train a CNN on the target dataset. This step is optional  
79 and trades improved quality for the computational cost of training a CNN from scratch.

80 Note that the Prediction Enhancer only takes the predictions of the Random Forest as input. Neither  
81 raw data nor labels of the source dataset are needed to apply it to new data. Our method can therefore  
82 be classified as *source-free domain adaptation*, but the additional feature-based learning step allows us  
83 to avoid training set estimation or reconstruction, commonly used in other source-free or knowledge  
84 distillation-based approaches like Liu et al. (2021); Du et al. (2021). At the same time, we can fully profit  
85 from all advances in the field of pseudo-label rectification (Zhang et al. (2021); Prabhu et al. (2021); Wu  
86 et al. (2021); Zhao et al. (2021)), applying those to pseudo-labels generated by the PE network.

## 87 2.1 Prediction Enhancer

88 The Prediction Enhancer is based on the U-Net architecture (Ronneberger et al. (2015)). To create training  
89 data, we train multiple Random Forests on the dense labels of the source domain, using the same pixel  
90 features as in the ilastik pixel classification workflow (Berg et al. (2019)). To obtain a diverse set of shallow  
91 classifiers we sample patches of various size and train a classifier for each patch based on the raw data and  
92 dense labels. Typically, we train 500 to 1000 different classifiers. Next, we train the U-Net following the  
93 standard approach for semantic segmentation, using Random Forest predictions (but not the raw data) as  
94 input and the provided dense labels of the source domain as the groundtruth. To create more variability, we  
95 sample from all previously trained classifiers. We use either the binary cross entropy or the Dice score as  
96 loss function.

97 Segmentation of a new dataset only requires training a single Random Forest; its predictions can directly  
98 be improved with the pre-trained Prediction Enhancer. Here, we use ilastik pixel classification workflow,  
99 which enables training a Random Forest interactively from brushstroke user annotations.

## 100 2.2 Further domain adaptation with pseudo-labels

101 The Prediction Enhancer can improve the segmentation results significantly, as shown in section 3.  
102 However, it relies only on the Random Forest predictions, and can thus not take intensity, texture or other  
103 raw image information into account. To make use of such information and further improve segmentation  
104 results, we can use the predictions of the Enhancer as pseudo-labels and train a segmentation U-Net on the  
105 target dataset. We use either Dice score or binary cross entropy as loss and make the following adjustments  
106 to the standard training procedure to enable training from noisy pseudo-labels:

- 107 • use the RF predictions as soft labels in range  $[0, 1]$  instead of hard labels in  $\{0, 1\}$ .
- 108 • Add a consistency loss term similar to (Tarvainen and Valpola (2017)) that compares the  
109 current predictions to the predictions of the network's exponential moving average. See also  
110 subsection 2.2.1.
- 111 • Use a simple label rectification strategy to weight the per-pixel loss based on the prediction confidence.  
112 See also subsection 2.2.2.

113 The combined loss function is defined as

$$L_R^{full} = L_R(\phi_f(x), \hat{y}) + L_{R,c}(\phi_f(x), \phi_g(x)) \quad (1)$$

114 with consistency term  $L_{R,c}$  (see next section) and rectified pseudo labels  $\hat{y}$  (Equation 6).  $L_R$  denotes either  
115 binary cross entropy (*BCE*) or Dice loss (*dice*).

### 116 2.2.1 Consistency Loss Term

117 For training with pseudo-labels we introduce a consistency term in the loss function, which is based on  
118 the "Mean Teacher" training procedure for semi-supervised classification Tarvainen and Valpola (2017).  
119 This method adds a loss term between the prediction of the network and its exponential moving average  
120 (EMA) to promote more consistent predictions across training iterations. We make use of this method for  
121 training a segmentation network  $\phi_f$  with parameters  $\theta_f$  from pseudo-labels. Its EMA is  $\phi_g$  parametrized by

$$\theta_g \leftarrow \alpha\theta_g + (1 - \alpha)\theta_f, \quad (2)$$

122 where we set the smoothing coefficient  $\alpha$  to 0.999 following Tarvainen and Valpola (2017).

123 Given that we are comparing the per pixel predictions of the current network and its EMA, we use the  
124 loss function that is also employed for comparing to the pseudo labels: we either use the Dice loss

$$L_{Dice,c}(p_f, p_g) = \frac{2 \sum_i^N p_{f,i} p_{g,i}}{\sum_i^N p_{f,i}^2 + \sum_i^N p_{g,i}^2} \quad (3)$$

125 or the binary cross entropy loss

$$L_{BCE,c}(p_f, p_g) = \frac{1}{N} \sum_i^N p_{g,i} \log(p_{f,i}) + (1 - p_{g,i})(1 - \log(p_{f,i})). \quad (4)$$

126 Where  $x$  denotes the input image,  $p_f = \phi_f(x)$ ,  $p_g = \phi_g(x)$  and  $N$  is the number of pixels. The combined  
127 loss function is

$$L_R(x, y) = L_R(\phi_f(x), y) + L_{R,c}(\phi_f(x), \phi_g(x)), \quad (5)$$

128 with pseudo-labels  $y$  and  $R$  either *Dice* or *BCE*.

## 129 2.2.2 Label Rectification

130 Label rectification is a common strategy in self-learning based domain adaptation methods, where  
131 predictions from the source model are used as pseudo-labels on the target domain. Rectification is then  
132 used to correct for the label noise. Several strategies have been proposed, for example based on the distance  
133 to class prototypes in the feature space (Zhang et al. (2021)) or prediction confidence after several rounds  
134 of dropout (Wu et al. (2021)).

135 Here, we adopt a simple label rectification strategy based on the prediction confidence to weight the  
136 pseudo-labels  $y$  (which correspond to the predictions of the enhancer):

$$\hat{y}_k = \omega_k y_k, \quad (6)$$

137 where  $k$  is the class index. For the case of foreground/background segmentation  $k \in \{0, 1\}$  and we define  
138 the per-pixel weight for the foreground class as

$$\omega_1 = 1 - \text{abs}(p_1 - \eta_1). \quad (7)$$

139 Here,  $p_1$  is the foreground probability predicted by the segmentation network and  $\eta_1$  the exponentially  
140 weighted average of foreground predictions:

$$\eta \leftarrow \lambda \eta + (1 - \lambda) * \text{mean}(S), \text{ where } S = \{p_1(x) | x \in X \text{ and } y_1(x) > 0.5\}. \quad (8)$$

141 Here,  $X$  is the set of all pixels in the current batch and we set  $\lambda = 0.999$  in all experiments. The weight  $\omega_0$   
142 for the background class is computed in the same manner.

### 3 RESULTS

#### 143 3.1 Data & Setup

144 We evaluate the proposed domain adaptation method on challenging semantic segmentation problems,  
145 including mitochondria segmentation in EM, membrane segmentation in EM and LM as well as nucleus  
146 segmentation in LM. Table 1 summarizes all datasets used for the experiments.

147 Some of the datasets we use represent image stacks and could be processed as 3D volumes with different  
148 levels of anisotropy. We choose to process them as independent 2D images instead to enable a wider set  
149 of source/target domain pairs. If not noted otherwise, training from pseudo-labels is performed using the  
150 consistency loss term and label rectification (Equation 1). We use a 2D U-Net architecture (Ronneberger  
151 et al. (2015)) with 64 features in the initial layer, 4 downsampling/upsampling levels and double the  
152 number of features per level for all networks. The network and training code is based on the PyTorch  
153 implementation from Wolny et al. (2020). For all training runs we use the Adam optimizer with initial  
154 learning rate of 0.0002, weight decay of 0.00001. Furthermore, we decrease the learning rate by a factor  
155 of 0.2 if the validation metric is not improving for a dataset dependent number of iterations. We use  
156 binary cross entropy as a loss function for the mitochondria (subsection 3.2) and nucleus (subsection 3.4)  
157 segmentation and dice loss for the membrane segmentation (subsection 3.3).

| Name            | EPFL                 | VNC                         | MitoEM-R          | MitoEM-H          | Kasthuri               | CREMI          |
|-----------------|----------------------|-----------------------------|-------------------|-------------------|------------------------|----------------|
| Organism/Tissue | Mouse/Hippocampus    | Fruitfly/ventral nerve cord | Rat/cortex        | Human/cortex      | Mouse/cortex           | Fruitfly/Brain |
| Modality        | FIBSEM               | ssTEM                       | sbEM              | sbEM              | ssTEM                  | ssTEM          |
| Tasks           | Mitochondria         | Mitochondria, Membranes     | Mitochondria      | Mitochondria      | Mitochondria           | Membranes      |
| Resolution      | 5×5×5 nm             | 45×5×5 nm                   | 30×8×8 nm         | 30×8×8 nm         | 30×3×3 nm              | 40×4×4 nm      |
| Reference       | Lucchi et al. (2013) | Gerhard et al. (2013)       | Wei et al. (2020) | Wei et al. (2020) | Kasthuri et al. (2015) | cremi.org      |

(a) Electron Microscopy datasets used in the experiments.

| Name            | Root                     | Ovules               | DSB-FL                | Monuseg             |
|-----------------|--------------------------|----------------------|-----------------------|---------------------|
| Organism/Tissue | Arabidopsis/Lateral root | Arabidopsis/ovules   | Various/nuclear stain | Human/kidney        |
| Modality        | Lightsheet               | Confocal             | Fluorescence          | Histopathology      |
| Tasks           | Membranes                | Membranes            | Nuclei                | Nuclei              |
| Resolution      | 0.25×0.1625×0.1625 μm    | 0.235×0.075×0.075 μm |                       |                     |
| Reference       | Wolny et al. (2020)      | Wolny et al. (2020)  | Caicedo et al. (2019) | Kumar et al. (2019) |

(b) Light Microscopy datasets used in the experiments.

**Table 1.** datasets used in the experiments

#### 158 3.2 Mitochondria segmentation

159 We first perform mitochondria segmentation in EM. We train the Prediction Enhancer on the EPFL  
160 dataset (the only FIB/SEM dataset in the collection) and then perform source-free domain adaptation on  
161 the VNC, MitoEM-R, MitoEM-H and Kasthuri datasets. For domain adaption, the Random Forest for  
162 initial target prediction is trained interactively in ilastik using a separate train split. The RF predictions are  
163 then improved by the PE and the improved predictions are used to as pseudo-labels for a U-Net trained  
164 from scratch (Pseudo-label Net). We compare to direct predictions of a U-Net trained for Mitochondria  
165 segmentation on the source domain EPFL (Source Net) and to the Y-Net (Roels et al. (2019)), a different  
166 method for domain adaptation, which is unsupervised on the target domain, but not source-free. We also  
167 indicate the performance of a U-Net trained on the target dataset as an estimate of the upper bound of the  
168 achievable performance (a separate train split is used).

169 Table 2 summarizes the resulting F1 scores (higher is better) for the source dataset and all target datasets.  
170 The Enhancer improves the Random Forest predictions significantly on all target datasets and the CNN  
171 trained from pseudo-labels further improves the results. The pseudo-label CNN always performs better than  
172 the source network or the Y-Net, which fails completely for the Kasthuri dataset where the domain gap is  
173 particularly large. Figure 2 shows an example of the improvements from RF to PE and PE to Pseudo-label  
174 Net.

| Model / Dataset  | EPFL  | VNC          | MitoEM-R     | MitoEM-H     | Kasthuri     |
|------------------|-------|--------------|--------------|--------------|--------------|
| Source Net       | 0.933 | 0.695        | 0.738        | 0.591        | 0.723        |
| Y-Net            | -     | 0.713        | 0.781        | 0.678        | 0.0          |
| RF               | 0.625 | 0.647        | 0.511        | 0.338        | 0.590        |
| PE               | 0.824 | 0.840        | 0.705        | 0.624        | 0.778        |
| Pseudo-label Net | -     | <b>0.884</b> | <b>0.793</b> | <b>0.751</b> | <b>0.834</b> |
| Target Net       | 0.933 | 0.891        | 0.939        | 0.920        | 0.942        |

**Table 2.** Results for mitochondria segmentation in EM. Quality is measured by the F1-score of the mitochondria prediction (higher is better). EPFL dataset is used as the source for domain adaptation by the Y-Net, Prediction Enhancer (PE) and Pseudo-label Net.

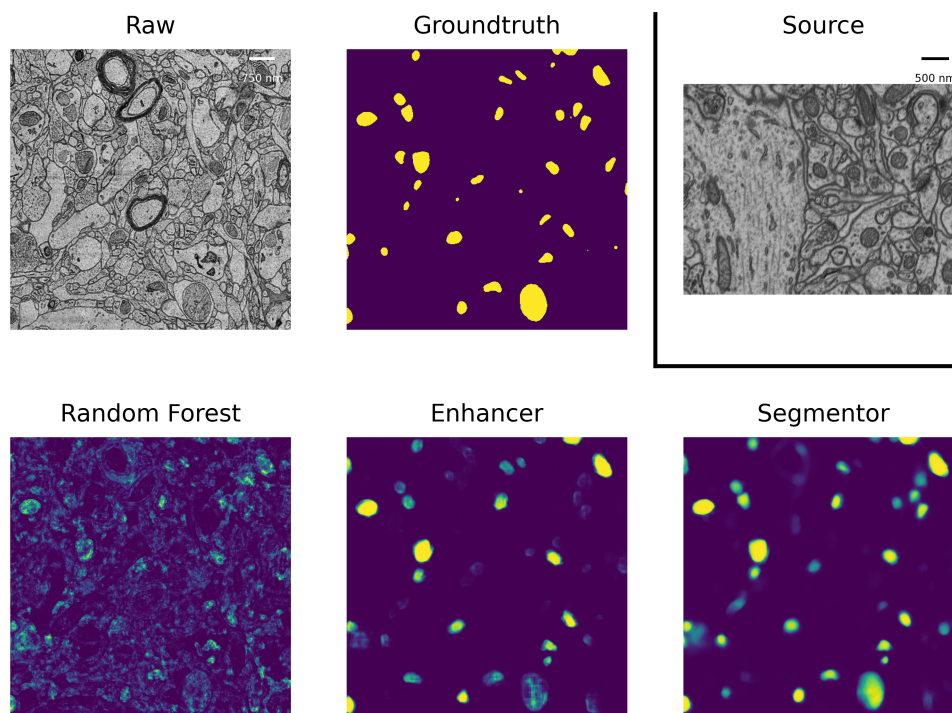

**Figure 2.** Mitochondria predictions of the Random Forest trained in ilastik, Prediction Enhancer and Pseudo-label CNN (“Segmentor”) as well as the groundtruth segmentation, on the MitoEM-H dataset. The Enhancer was pre-trained on the EPFL dataset; EPFL raw data shown under Source.

175 For the mitochondria segmentation task we also check if training the PE on multiple source datasets  
176 improves results. Table 3 shows that this is indeed the case, especially for the Kasthuri dataset.

| Source                          | EPFL  | VNC   | MitoEM-R | MitoEM-H | Kasthuri |
|---------------------------------|-------|-------|----------|----------|----------|
| EPFL                            | 0.811 | 0.786 | 0.627    | 0.505    | 0.612    |
| EPFL, VNC                       | 0.806 | 0.818 | 0.642    | 0.515    | 0.672    |
| EPFL, VNC<br>MitoEM-R, MitoEM-H | 0.833 | 0.832 | 0.675    | 0.586    | 0.720    |

**Table 3.** Mitochondria segmentation results for PE trained on multiple source datasets. The left column indicates the source datasets, quality is measured with the F1 score.

### 177 3.3 Membrane segmentation

178 We perform membrane segmentation both in EM and LM data. To evaluate membrane segmentations, we  
179 set up a Multicut based post-processing procedure following Beier et al. (2017) to transform the boundary  
180 segmentation into an instance segmentation, followed by evaluation with the Variation of Information  
181 (Meilă (2003)). We choose this more elaborate evaluation procedure as boundary segmentation is often  
182 used as the first step in instance segmentation pipelines and needs to be evaluated in this context. Simple  
183 evaluation by boundary F1 score is often not indicative of the actual quality of a boundary segmentation  
184 due to the large influence of seemingly small prediction errors, such as holes, on the follow-up instance  
185 segmentation. For the Variation of Information lower values correspond to a better segmentation.

186 In EM we perform boundary segmentation of brain tissue using the VNC dataset as source and  
187 three different datasets from the CREMI challenge ([cremi.org](http://cremi.org)) as target. Table 4 shows that the PE  
188 significantly improves the RF predictions for all three target datasets. The network trained on pseudo-labels  
189 can further improve results, especially for CREMI B and C, which pose a more challenging segmentation  
190 problem due to more irregular and elongated neurites compared to CREMI A. Both PE and Pseudo-label Net  
191 perform significantly better than a segmentation network trained on the source dataset. The segmentation  
192 results of a segmentation network trained on a separate split of the target dataset are shown to indicate an  
193 upper bound of the segmentation performance. Figure 3 shows the improvement brought by the PE and the  
194 Pseudo-label Net on an image from CREMI C.

| Model / Dataset  | CREMI A      | CREMI B      | CREMI C      |
|------------------|--------------|--------------|--------------|
| Source Net       | 1.031        | 2.089        | 1.925        |
| RF               | 1.092        | 2.231        | 2.363        |
| PE               | 0.856        | 2.107        | 1.819        |
| Pseudo-Label Net | <b>0.840</b> | <b>1.806</b> | <b>1.582</b> |
| Target Net       | 0.559        | 0.739        | 1.055        |

**Table 4.** Results for boundary segmentation in EM. Quality is measured by the Variation of Information (lower is better) after instance segmentation via Multicut post-processing. Source Net and PE are trained on the VNC dataset and then applied to the three target datasets CREMI A, B and C. RF is trained interactively with ilastik on each target dataset.

195 In LM we perform boundary segmentation of cells in a confocal image stack of Arabidopsis ovules. We  
196 use a light-sheet image stack of Arabidopsis roots as source data. Note that we downsample both roots  
197 and ovules datasets by a factor of 2 for these experiments to increase the field of view of the segmentation  
198 networks. While this leads to source and target datasets with different resolutions (native resolution is  
199  $0.1625 \mu\text{m}$  for roots and  $0.075 \mu\text{m}$  for ovules, see Table 1b) the size of the structure of interest matches  
200 best in this setting. Table 5 shows the results in the “Roots (LM)” column. While the PE improves the



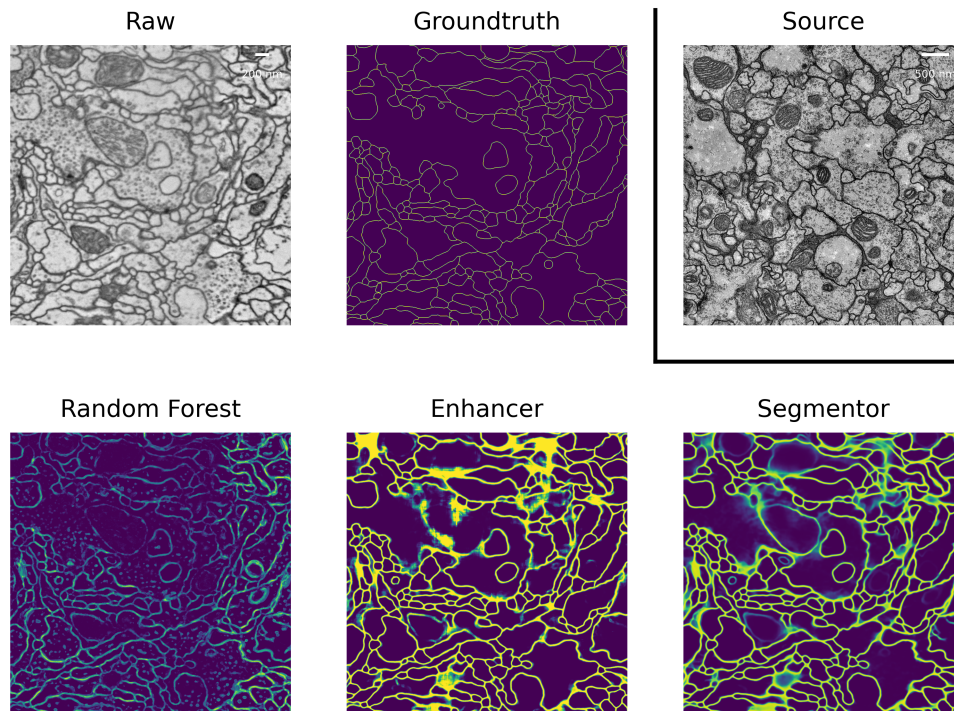

**Figure 3.** Boundary predictions of the Random Forest trained in ilastik, Prediction Enhancer and Pseudo-label Net, as well as the groundtruth segmentation, on the CREMI C dataset. The Enhancer was pre-trained on VNC, VNC raw data shown under Source.

201 RF predictions and the Pseudo-label Net further improves result, we find that the source net performs  
202 better than any of our methods in this case. This can be explained by the fact that the quality of the RF  
203 segmentation is, in contrast to previous experiments, far inferior to the quality of the source network and  
204 the improvements afforded by PE and pseudo-label training are not sufficient to surpass the segmentation  
205 quality of the source network. Qualitatively, the RF predictions can be seen in Figure 4; the predictions  
206 amplify most of the signal in the image. This leads to a over-segmentation in the downstream instance  
207 segmentation, resulting in low quality segmentation. Note that the overall quality of results reported here is  
208 inferior compared to the results reported in Wolny et al. (2020). This can be explained by the fact that all  
209 models only receive 2D input, whereas the state-of-the-art uses 3D models.

210 We also experiment with a much larger domain shift and apply a PE that was trained on the EM dataset  
211 CREMI A as source. The results are shown in the “CREMI (EM)” column in Table 5. As expected, transfer  
212 of the source network fails, because it was trained on a completely different domain. However, the PE  
213 successfully improves RF predictions and pseudo-label training further improves the results. The fact  
214 that the PE only receives the RF predictions as input enables successful transfer in this case; while the  
215 image data distribution is very different in source and target domain, Random Forest probability maps  
216 look sufficiently similar. Furthermore, the resolution of the two domains differs by almost 3 orders of  
217 magnitude. However, the size of the structures in pixels is fairly similar, enabling successful domain  
218 adaptation. Figure 4 shows RF, PE and Pseudo-label Net predictions next to the source and target domain  
219 data.

| Model / Source   | Root (LM)    | CREMI (EM)   |
|------------------|--------------|--------------|
| Source Net       | <b>1.863</b> | 3.257        |
| RF               | 2.442        | 2.442        |
| PE               | 2.032        | 2.345        |
| Pseudo-Label Net | 1.982        | <b>2.309</b> |
| Target Net       | 1.561        | 1.561        |

**Table 5.** LM-Boundaries and cross modality experiments: Variation of Information after applying simple Multicut to the boundary predictions.

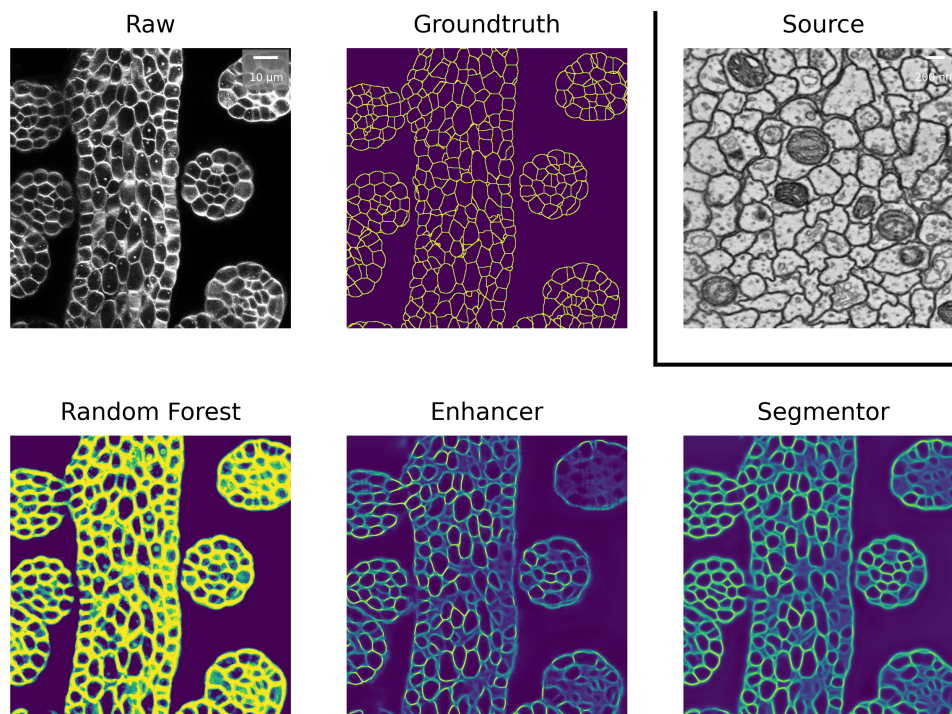

**Figure 4.** Boundary predictions of the Random Forest trained in ilastik, Prediction Enhancer and Pseudo-label Net, as well as groundtruth segmentation, on the ovules dataset. The enhancer was pre-trained on CREMI A, CREMI A raw data shown under Source.

### 220 3.4 Nuclei segmentation

221 As another example of cross-modality adaptation, we perform a an experiment for nucleus segmentation  
222 between fluorescence microscopy images from Caicedo et al. (2019) (DSB-FL) and histopathology images  
223 of the human kidney from Kumar et al. (2019) (Monuseg). Table 6 shows the results for using Monuseg as  
224 source and DSB-FL as target (column “DSB-FL”) and vice versa (column “Monuseg”). Here, the PE only  
225 affords a negligible improvement in the F1 score over the RF predictions but training from pseudo-labels  
226 improves the scores. We assume that the transfer of the PE is not very effective in this case because of very  
227 different nucleus sizes between the two datasets. The large domain shift is apparent from the fact that the  
228 Source Net does not generalize to the target domain at all in both cases.

| Source  | Method/Dataset   | DSB-FL       | Monuseg      |
|---------|------------------|--------------|--------------|
|         | Ilastik          | 0.661        | 0.601        |
| DSB-FL  | Source Net       | -            | 0.014        |
|         | Enhancer         | -            | 0.620        |
|         | Pseudo-label Net | -            | <b>0.654</b> |
| Monuseg | Source Net       | 0.001        | -            |
|         | Enhancer         | 0.661        | -            |
|         | Pseudo-label Net | <b>0.719</b> | -            |
|         | Target Net       | 0.936        | 0.721        |

**Table 6.** Results of nucleus segmentation. DSB-FL columns shows results for domain adaptation from Monuseg (Histopathology) to DSB-FL (Fluorescence), Monuseg column shows the opposite. The segmentation quality is measured by the F1 score.

### 229 3.5 Ablation studies

230 In the following, we perform ablation studies to determine the impact of some of our design choices on  
231 the overall performance of the method.

232 First, we investigate if the consistency loss (CL, equation 4) and label rectification (LR, equation  
233 6) improve the accuracy obtained after pseudo-label training. We perform pseudo-label training for  
234 mitochondria segmentation on the VNC and MitoEM-R datasets using the PE trained on VNC to generate  
235 the pseudo-labels. We perform the training without any modification of the loss, adding only CL, adding  
236 only LR and adding both CL and LR. The results in Table 7 show that both CL and LR improve performance  
237 on their own. Combining them leads to an additional small improvement on VNC and to a slight decrease  
238 in quality on MitoEM-R.

| Method / Dataset        | VNC          | MitoEM-R     |
|-------------------------|--------------|--------------|
| PE                      | 0.840        | 0.705        |
| Pseudo-labels           | 0.869        | 0.768        |
| Pseudo-labels + CL      | 0.877        | 0.788        |
| Pseudo-labels + LR      | 0.869        | <b>0.798</b> |
| Pseudo-labels + CL + LR | <b>0.884</b> | 0.793        |

**Table 7.** Results of pseudo-label network training using different loss functions. Mitochondria segmentation with EPFL as source dataset and VNC, MitoEM-R as target datasets. Segmentation accuracy is measured by the F1 score.

239 Using the same experiment setup, we also investigate whether using the PE enhancer for generating the  
240 pseudo-labels is actually beneficial compared to using the RF trained on target or using the source network.  
241 Table 8 shows that using the PE for pseudo-label generation significantly improves over the two other  
242 approaches.

### 243 3.6 Limitations

244 The high number of layers, their interconnections and especially skip-connections between them allow  
245 the U-net to implicitly learn a strong shape prior for the objects of interest. This effect is exacerbated in our  
246 Prediction Enhancer network as it by design does not observe the raw pixel properties and has to exploit  
247 shape cues even more than a regular segmentation U-net. While this effect is clearly advantageous for

| Pseudo-labels         | VNC          | MitoEM-R     |
|-----------------------|--------------|--------------|
| RF                    | 0.546        | 0.648        |
| RF w/ CL + LR         | 0.584        | 0.656        |
| Source Net            | 0.707        | 0.754        |
| Source Net w/ CL + LR | 0.794        | 0.765        |
| PE                    | 0.869        | 0.768        |
| PE w/ CL + LR         | <b>0.884</b> | <b>0.793</b> |

**Table 8.** Results of pseudo-label network training using RF, Source Network and PE for label generation. Mitochondria segmentation with EPFL as source dataset and VNC, MitoEM-R as target datasets. Segmentation quality is measured by the F1 score.

248 same-task transfer learning, it can lead to catastrophic network hallucinations if very differently shaped  
249 objects of interest need to be segmented in the target domain. To illustrate this point, we show the transfer  
250 of a PE learned for mitochondria on the EPFL dataset to predict boundaries on the VNC dataset and vice  
251 versa in Figure 5. The PE amplifies/hallucinates the structures it was trained on while suppressing all other  
252 signal in the prediction.

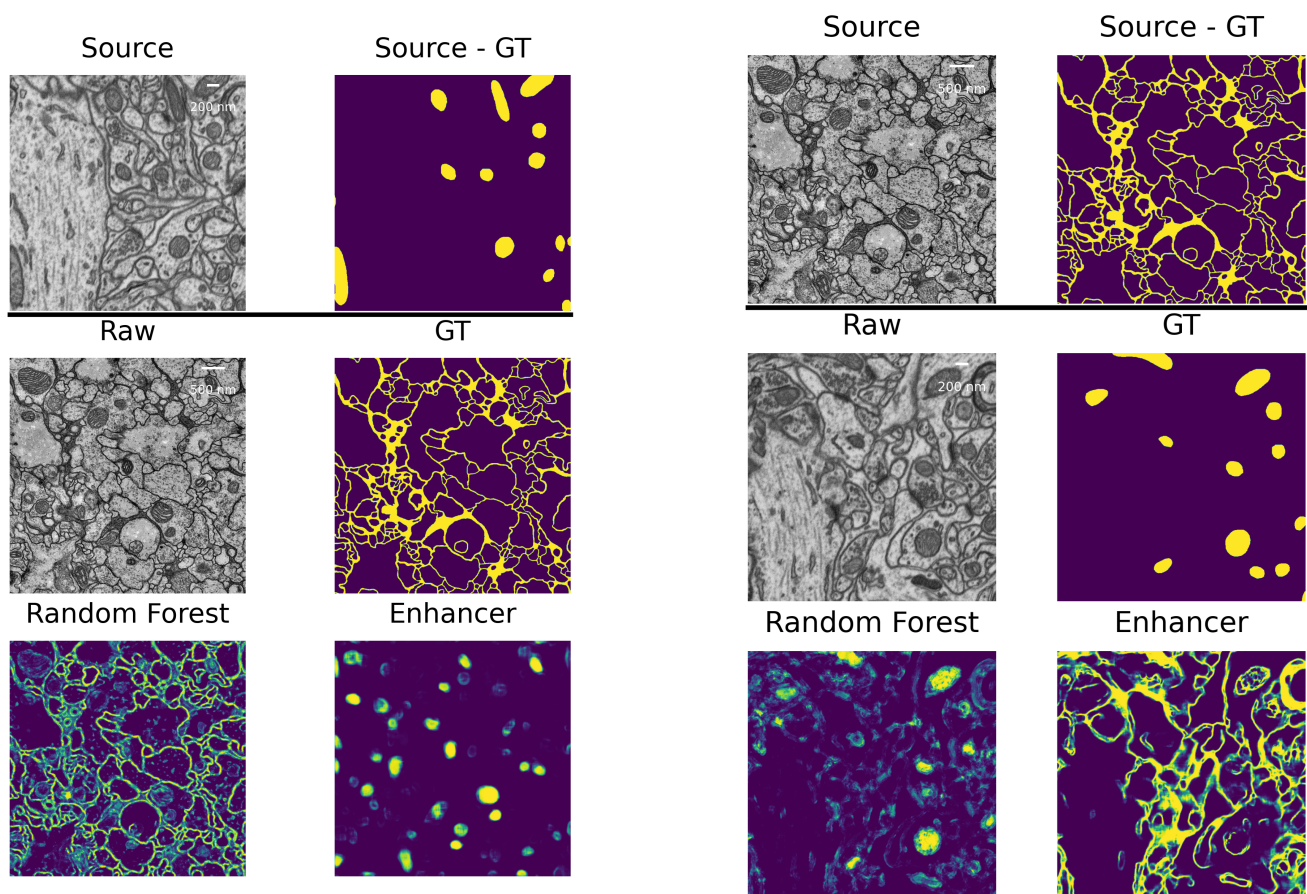

(a) Domain adaptation of a PE trained for mitochondria segmentation on the EPFL dataset to boundary prediction task on the VNC dataset.

(b) Domain adaptation of a PE trained for boundary prediction on the VNC dataset to mitochondria segmentation task on the EPFL dataset.

**Figure 5.** Failure case: different segmentation tasks in source and target datasets.

## 4 DISCUSSION

253 We have introduced a simple, source-free, weakly supervised approach to transfer learning in microscopy  
254 which can overcome significant domain gaps and does not require adversarial training. In our setup, the  
255 feature-based classifier which is trained from sparse annotations on the target domain acts as an implicit  
256 domain adapter for the Prediction Enhancer network. The combination of the feature-based classifier and  
257 the prediction enhancer substantially outperforms the segmentation CNN trained on the source domain, with  
258 further improvement brought by an additional training step where the Enhancer predictions on the target  
259 dataset serve as pseudo-labels. Since the Enhancer network never sees the raw data as input, our method  
260 can perform transfer learning between domains of drastically different appearance, e.g. between light and  
261 electron microscopy images. By design, this kind of domain gap cannot be handled by unsupervised domain  
262 adaptation methods which rely on network feature or raw data alignment. Furthermore, even for small  
263 domain gaps and in presence of label rectification strategies, pseudo-labels produced by the Prediction  
264 Enhancer lead to much better segmentation CNNs than pseudo-labels of the source network. We expect  
265 these results to improve even further with the more advanced label rectification approaches which are now  
266 actively introduced in the field.

267 The major limitation of our approach is the dependency on the quality of the feature-based classifier  
268 predictions. We expect that in practice users will train it interactively on the target domain which already  
269 produces better results than “bulk” training: in our mitochondria segmentation experiments, also shown in  
270 Table 2, there was commonly a 1.5-2 fold improvement in F1-score between interactive ilastik training  
271 in the target domain and RF training in a script without seeing the data. In general, the performance of  
272 the Prediction Enhancer will lag behind the performance of a segmentation network trained directly on  
273 the raw data with dense groundtruth labels except for very easy problems that can be solved by the RF  
274 to 100% accuracy. In a way, the Random Forest acts as a lossy compression algorithm for the raw data,  
275 which reduces the discriminative power for the Enhancer. However, the pseudo-label training step can  
276 again compensate for the “compression” as it allows to train another network on the raw data of the target  
277 domain, with pseudo-labels for potentially very large amounts of unlabeled data.

278 For simplicity, and also to sample as many source/target pairs with full groundtruth as possible, we have  
279 only demonstrated results on 2D data, in a binary foreground/background classification setting. Extension  
280 to 3D is straightforward and would not require any changes in our method other than accounting for  
281 potentially different z resolution between source and target datasets. Extension to multi-class segmentation  
282 would only need a simple update to the pseudo-label training loss.

283 In future work, we envision integration of our approach with other pseudo-label training strategies.  
284 Furthermore, as pseudo-label training can largely be configured without target domain knowledge, we  
285 expect our method to be a prime candidate for user-facing tools which already include interactive feature-  
286 based classifier training.

## CONFLICT OF INTEREST STATEMENT

287 The authors declare that the research was conducted in the absence of any commercial or financial  
288 relationships that could be construed as a potential conflict of interest.

## **AUTHOR CONTRIBUTIONS**

289 AK, AM, AW and CP have conceptualized the method. AM has implemented the method and run the  
290 experiments under the supervision of AK, AW and CP. AM and CP have drafted the manuscript and AK,  
291 AW and CP have written the final manuscript.

## **FUNDING**

292 Adrian Wolny was funded by DFG FOR2581 for this work.

## **ACKNOWLEDGMENTS**

293 We thank the EMBL IT Services for their support.

## **DATA AVAILABILITY STATEMENT**

294 All datasets used for experiments are publicly available and can be obtained from their original publications,  
295 see Table 1. The code and models produced in this paper will be made available upon acceptance.

## **REFERENCES**

- 296 Arganda-Carreras, I., Kaynig, V., Rueden, C., Eliceiri, K. W., Schindelin, J., Cardona, A., et al. (2017).  
297 Trainable weka segmentation: a machine learning tool for microscopy pixel classification. *Bioinformatics*  
298 33, 2424–2426
- 299 Beier, T., Pape, C., Rahaman, N., Prange, T., Berg, S., Bock, D. D., et al. (2017). Multicut brings automated  
300 neurite segmentation closer to human performance. *Nature methods* 14, 101–102
- 301 Belevich, I., Joensuu, M., Kumar, D., Vihinen, H., and Jokitalo, E. (2016). Microscopy image browser: a  
302 platform for segmentation and analysis of multidimensional datasets. *PLoS biology* 14, e1002340
- 303 Berg, S., Kutra, D., Kroeger, T., Straehle, C. N., Kausler, B. X., Haubold, C., et al. (2019). Ilastik:  
304 interactive machine learning for (bio) image analysis. *Nature Methods* 16, 1226–1232
- 305 Bermúdez-Chacón, R., Altingövde, O., Becker, C., Salzmann, M., and Fua, P. (2019). Visual  
306 correspondences for unsupervised domain adaptation on electron microscopy images. *IEEE transactions*  
307 *on medical imaging* 39, 1256–1267
- 308 Caicedo, J. C., Goodman, A., Karhohs, K. W., Cimini, B. A., Ackerman, J., Haghghi, M., et al. (2019).  
309 Nucleus segmentation across imaging experiments: the 2018 data science bowl. *Nature methods* 16,  
310 1247–1253
- 311 Chen, C., Dou, Q., Chen, H., Qin, J., and Heng, P.-A. (2019). Synergistic image and feature adaptation:  
312 Towards cross-modality domain adaptation for medical image segmentation. In *Proceedings of the AAAI*  
313 *Conference on Artificial Intelligence*. vol. 33, 865–872
- 314 Choi, J., Jeong, M., Kim, T., and Kim, C. (2019). Pseudo-labeling curriculum for unsupervised domain  
315 adaptation. *arXiv preprint arXiv:1908.00262*
- 316 Du, Y., Yang, H., Chen, M., Jiang, J., Luo, H., and Wang, C. (2021). Generation, augmentation, and  
317 alignment: A pseudo-source domain based method for source-free domain adaptation. *arXiv preprint*  
318 *arXiv:2109.04015*
- 319 El Jurdi, R., Petitjean, C., Honeine, P., Cheplygina, V., and Abdallah, F. (2021). High-level prior-based  
320 loss functions for medical image segmentation: A survey. *Computer Vision and Image Understanding*  
321 210, 103248

- 322 Fernández-Delgado, M., Cernadas, E., Barro, S., and Amorim, D. (2014). Do we need hundreds of  
323 classifiers to solve real world classification problems? *The journal of machine learning research* 15,  
324 3133–3181
- 325 Gerhard, S., Funke, J., Martel, J., Cardona, A., and Fetter, R. (2013). Segmented anisotropic sstem dataset  
326 of neural tissue. *figshare* , 0–0
- 327 Han, S., Pool, J., Narang, S., Mao, H., Tang, S., Elsen, E., et al. (2016). DSD: regularizing deep neural  
328 networks with dense-sparse-dense training flow. *CoRR* abs/1607.04381
- 329 Januszewski, M. and Jain, V. (2019). Segmentation-enhanced cyclegan. *bioRxiv* , 548081
- 330 Kasthuri, N., Hayworth, K. J., Berger, D. R., Schalek, R. L., Conchello, J. A., Knowles-Barley, S., et al.  
331 (2015). Saturated reconstruction of a volume of neocortex. *Cell* 162, 648–661
- 332 Kumar, N., Verma, R., Anand, D., Zhou, Y., Onder, O. F., Tsougenis, E., et al. (2019). A multi-organ  
333 nucleus segmentation challenge. *IEEE transactions on medical imaging* 39, 1380–1391
- 334 Liu, D., Zhang, D., Song, Y., Zhang, F., O’Donnell, L., Huang, H., et al. (2020). Pdam: A panoptic-level  
335 feature alignment framework for unsupervised domain adaptive instance segmentation in microscopy  
336 images. *IEEE Transactions on Medical Imaging* 40, 154–165
- 337 Liu, Y., Zhang, W., and Wang, J. (2021). Source-free domain adaptation for semantic segmentation. In  
338 *Proceedings of the IEEE/CVF Conference on Computer Vision and Pattern Recognition*. 1215–1224
- 339 Long, M., Cao, Y., Wang, J., and Jordan, M. (2015). Learning transferable features with deep adaptation  
340 networks. In *International conference on machine learning* (PMLR), 97–105
- 341 Lucchi, A., Li, Y., and Fua, P. (2013). Learning for structured prediction using approximate subgradient  
342 descent with working sets. In *Proceedings of the IEEE Conference on Computer Vision and Pattern  
343 Recognition*. 1987–1994
- 344 Meilă, M. (2003). Comparing clusterings by the variation of information. In *Learning theory and kernel  
345 machines* (Springer). 173–187
- 346 Prabhu, V., Khare, S., Kartik, D., and Hoffman, J. (2021). S4t: Source-free domain adaptation for semantic  
347 segmentation via self-supervised selective self-training. *arXiv preprint arXiv:2107.10140*
- 348 Roels, J., Hennies, J., Saeys, Y., Philips, W., and Kreshuk, A. (2019). Domain adaptive segmentation  
349 in volume electron microscopy imaging. In *2019 IEEE 16th International Symposium on Biomedical  
350 Imaging (ISBI 2019)* (IEEE), 1519–1522
- 351 Ronneberger, O., Fischer, P., and Brox, T. (2015). U-net: Convolutional networks for biomedical  
352 image segmentation. In *International Conference on Medical image computing and computer-assisted  
353 intervention* (Springer), 234–241
- 354 Rozantsev, A., Salzmann, M., and Fua, P. (2018). Beyond sharing weights for deep domain adaptation.  
355 *IEEE transactions on pattern analysis and machine intelligence* 41, 801–814
- 356 Taha, A., Shrivastava, A., and Davis, L. (2021). Knowledge evolution in neural networks. In *Proceedings  
357 of the IEEE/CVF Conference on Computer Vision and Pattern Recognition (CVPR)*
- 358 Tarvainen, A. and Valpola, H. (2017). Mean teachers are better role models: Weight-averaged consistency  
359 targets improve semi-supervised deep learning results. In *Proceedings of the 31st International  
360 Conference on Neural Information Processing Systems* (Red Hook, NY, USA: Curran Associates  
361 Inc.), NIPS’17, 1195–1204
- 362 Wei, D., Lin, Z., Franco-Barranco, D., Wendt, N., Liu, X., Yin, W., et al. (2020). Mitoem dataset:  
363 Large-scale 3d mitochondria instance segmentation from em images. In *International Conference on  
364 Medical Image Computing and Computer-Assisted Intervention* (Springer), 66–76
- 365 Wolny, A., Cerrone, L., Vijayan, A., Tofanelli, R., Barro, A. V., Louveaux, M., et al. (2020). Accurate and  
366 versatile 3d segmentation of plant tissues at cellular resolution. *Elife* 9, e57613

- 367 Wu, S., Chen, C., Xiong, Z., Chen, X., and Sun, X. (2021). Uncertainty-aware label rectification for  
368 domain adaptive mitochondria segmentation. In *International Conference on Medical Image Computing*  
369 *and Computer-Assisted Intervention* (Springer), 191–200
- 370 Xing, F., Bennett, T., and Ghosh, D. (2019). Adversarial domain adaptation and pseudo-labeling for cross-  
371 modality microscopy image quantification. In *International Conference on Medical Image Computing*  
372 *and Computer-Assisted Intervention* (Springer), 740–749
- 373 Zhang, P., Zhang, B., Zhang, T., Chen, D., Wang, Y., and Wen, F. (2021). Prototypical pseudo label  
374 denoising and target structure learning for domain adaptive semantic segmentation. In *Proceedings of*  
375 *the IEEE/CVF Conference on Computer Vision and Pattern Recognition*. 12414–12424
- 376 Zhang, Y., Miao, S., Mansi, T., and Liao, R. (2018). Task driven generative modeling for unsupervised  
377 domain adaptation: Application to x-ray image segmentation. In *International Conference on Medical*  
378 *Image Computing and Computer-Assisted Intervention* (Springer), 599–607
- 379 Zhao, Y., Zhong, Z., Luo, Z., Lee, G. H., and Sebe, N. (2021). Source-free open compound domain  
380 adaptation in semantic segmentation. *arXiv preprint arXiv:2106.03422*
